# Supplementary material for: A highly sensitive and selective fluorescent probe without quencher for detection of Pb2+ ions based on aggregation-caused quenching phenomenon
Source: Royal Society of Chemistry journal article supplement (doi:10.1039/c8ra07903j), 2018-01-01
Supplement: c8ra07903j1.pdf [file c8ra07903j1.pdf]

## Electronic supplementary information

### **A highly sensitive and selective fluorescent probe without quencher for Pb<sup>2+</sup> ions detection based on ACQ phenomenon**

Qianyun Li<sup>1,2</sup>, Yongmei Jia<sup>2</sup>, Zongcai Feng<sup>2\*</sup>, Fang Liu<sup>1\*</sup>

(1 School of Materials Science and Engineering, South China University of Technology, Guangzhou 510640, Guangdong, China; 2 Institute for Advanced Materials, Lingnan Normal University, Zhanjiang 524048, Guangdong, China)

\* Corresponding author.

\*E-mail: mcfliu@scut.edu.cn

\*E-mail: fengzongcai921@163.com

## Synthesis of conjugate fluorophore

The synthesis route of conjugate fluorophore was shown in Fig. S1. It was based on previous reports<sup>1-3</sup>.

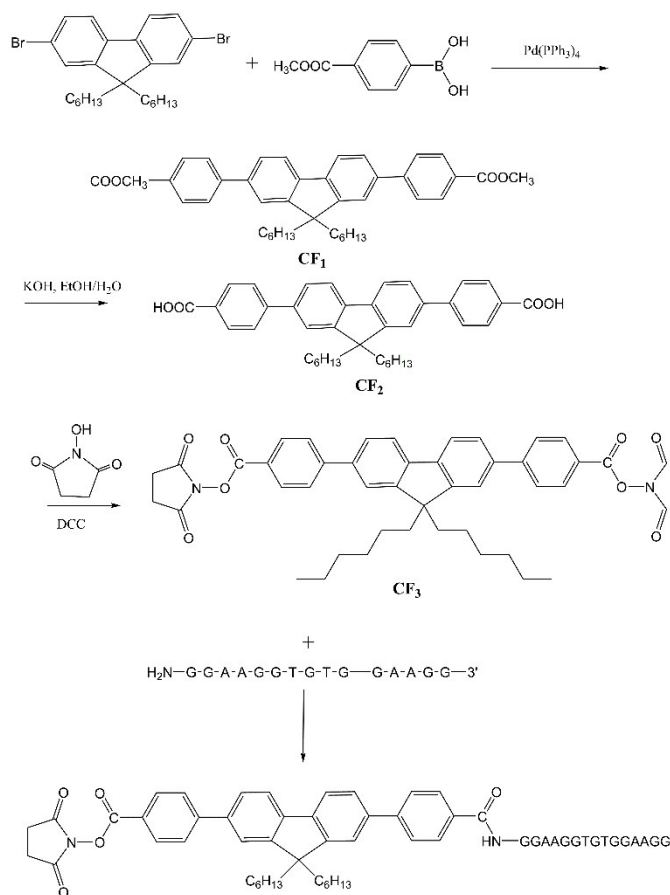

**Fig. S1** Synthetic route for CF-DNA probe.

2,7-bis (4-phenylcarboxylic acid methyl ester)-9,9-di-n-octylfluorene ( $\text{CF}_1$ ) was synthesized using a previously reported method via the Suzuki reaction. 2,7-Dibromo-9,9-di-n-octylfluorene (4.917 g, 10 mmol), 4-methoxycarbonylphenylboronic acid (4.169 g, 23.3 mmol) and  $\text{K}_2\text{CO}_3$  solution (2 M, 56 mL), and Tetrakis(triphenylphosphine)palladium(0) (300 mg) and THF (60mL) were vigorously stirred at  $80^\circ\text{C}$  for 18 h under a nitrogen atmosphere. The reaction mixture was extracted into ethyl acetate ( $3 \times 25$  mL) and washed with brine (100 mL). After drying over anhydrous  $\text{MgSO}_4$ , the product was purified by silica-gel column chromatography (4.745g, 78.8%) (Fig. S2).  $^1\text{H}$  NMR (400 MHz,  $\text{CDCl}_3$ )  $\delta$  8.17 (d,  $J$

= 8.3 Hz, 4H), 7.84 (d,  $J = 7.9$  Hz, 2H), 7.77 (d,  $J = 8.4$  Hz, 4H), 7.69 – 7.59 (m, 4H), 3.99 (s, 6H), 2.13 – 2.01 (m, 4H), 1.18 – 1.00 (m, 12H), 0.76 (dd,  $J = 16.1, 9.0$  Hz, 10H).

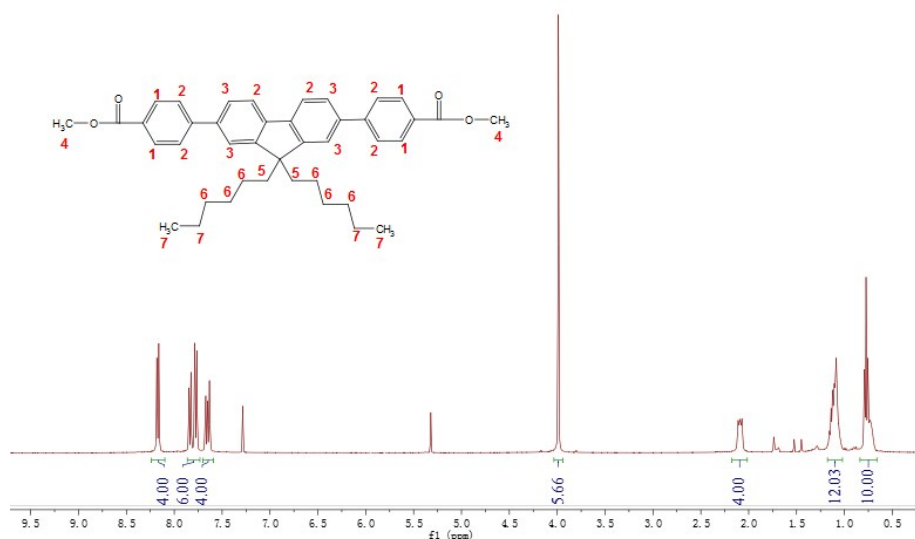

**Fig. S2** The  $^1\text{H}$  NMR of the  $\text{CF}_1$ .

$\text{CF}_1$  (1.40g, 2.33 mmol) was dissolved in 30 mL of THF/ $\text{H}_2\text{O}$  (2:1, v/v), then KOH (1.60g, 28 mmol) was added, and the mixture was reflux for 12h. Then 100 mL water was added into the solution, then acidified with HCl. The precipitated white solid was washed 3 times and vacuum-dried without further purification (1.359, 100%) (Fig. S3).  $^1\text{H}$  NMR (400 MHz, DMSO)  $\delta$  13.04 (s, 2H), 8.04 (s, 4H), 7.97 (s, 2H), 7.90 (s, 6H), 7.77 (d,  $J = 7.9$  Hz, 2H), 2.19 – 2.09 (m, 4H), 1.24 – 0.67 (m, 22H).

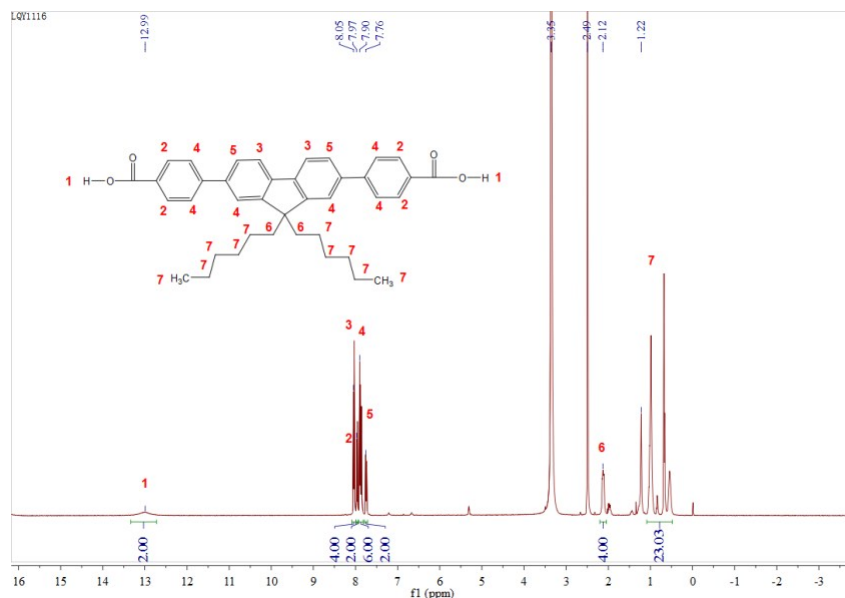

**Fig. S3** The <sup>1</sup>H NMR of the CF<sub>2</sub>.

CF<sub>2</sub> (808 mg, 1.4 mmol) and N-hydroxysuccinimide (NHS, 760 mg, 6.25 mmol) were dissolved in dry N, N-Dimethylformamide (DMF) (8mL). DCC (180 mg, 0.87 mmol) dissolved in DMF (7 mL) was added and stirred at room temperature for 48 h. The mixture was extracted with dichloromethane (30 mL) and then washed with plenty of water, then crude product was purified by silica-gel column chromatography (458 mg, 56.7%) (Fig. S4). <sup>1</sup>H NMR (400 MHz, CDCl<sub>3</sub>) δ 8.26 (d, *J* = 8.2 Hz, 4H), 7.90 – 7.79 (m, 6H), 7.70 – 7.62 (m, 4H), 2.96 (s, 8H), 2.10 (s, 5H), 1.10 (s, 13H), 0.77 (d, *J* = 7.1 Hz, 12H).

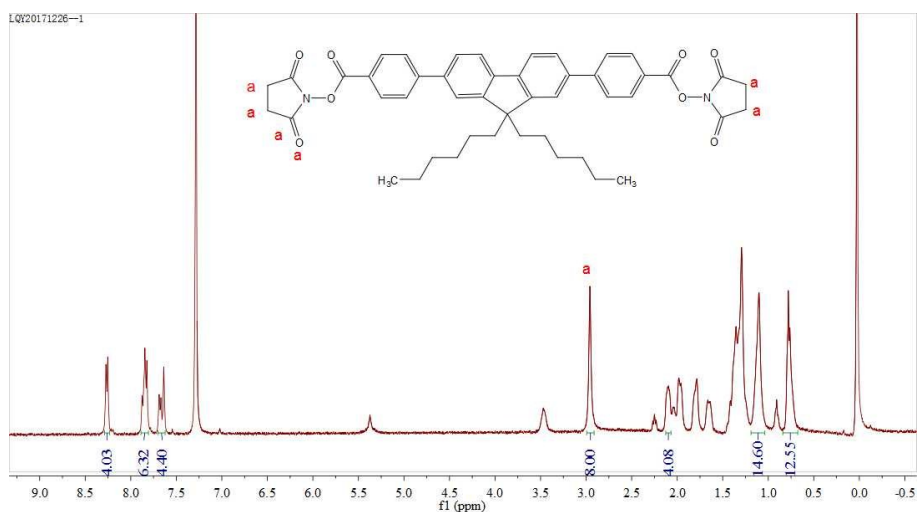

**Fig. S4** The  $^1\text{H}$  NMR of the  $\text{CF}_3$

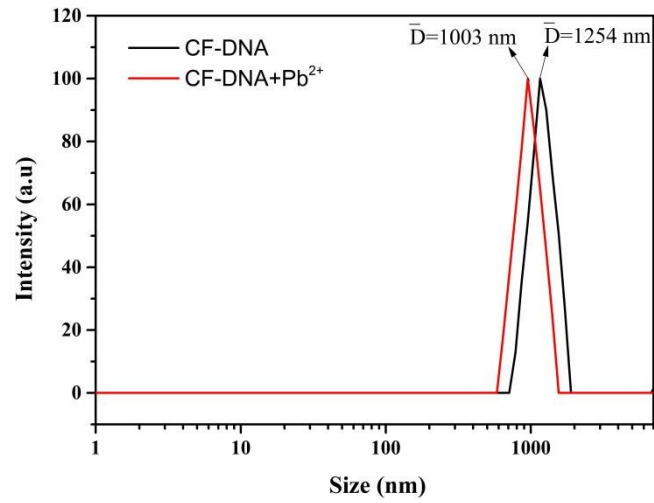

**Fig. S5** Light scattering measurement of CF-DNA ( $5 \mu\text{M}$ ) probe before and after the  $\text{Pb}^{2+}$  detection in PBS buffer.

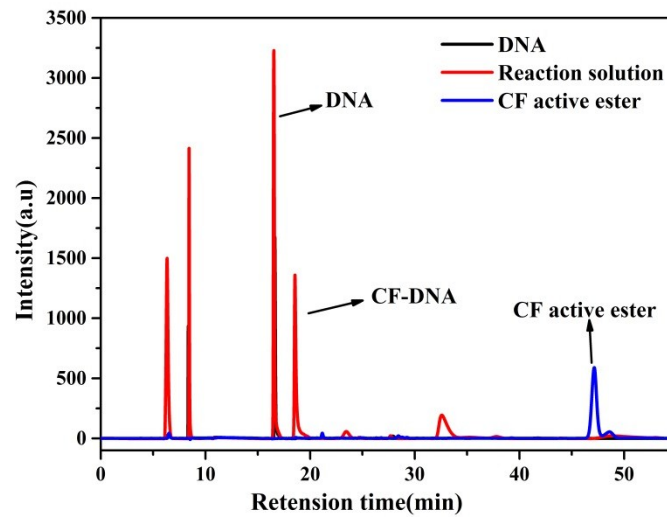

**Fig. S6** The result of HPLC purification. The retention time of DNA (black line) was 16.5 min while the retention time of CF-DNA probe 18.65 min.

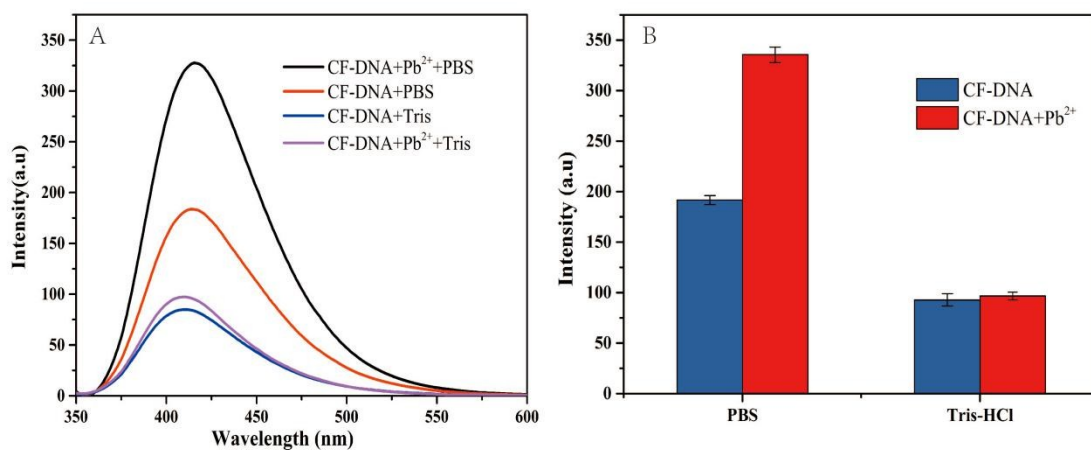

**Fig. S7** The fluorescence intensity of CF-DNA probe in different buffer system

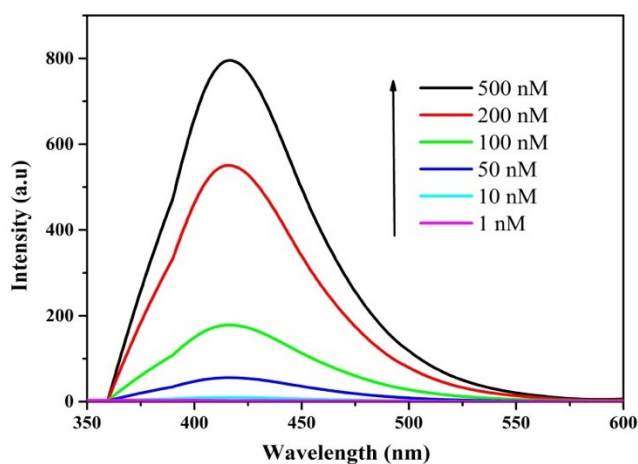

**Fig. S8** The fluorescence spectra of different concentration of CF-DNA.

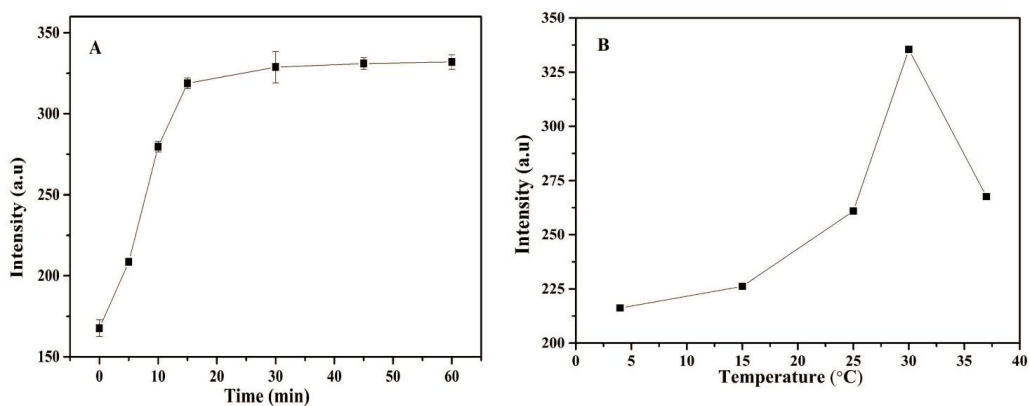

**Fig. S9** The Optimization of conditions for Pb<sup>2+</sup> detection. (A) Fluorescence intensity change for detecting Pb<sup>2+</sup> with the increasing of time. (B) Fluorescence intensity change for detecting Pb<sup>2+</sup> under different temperature.

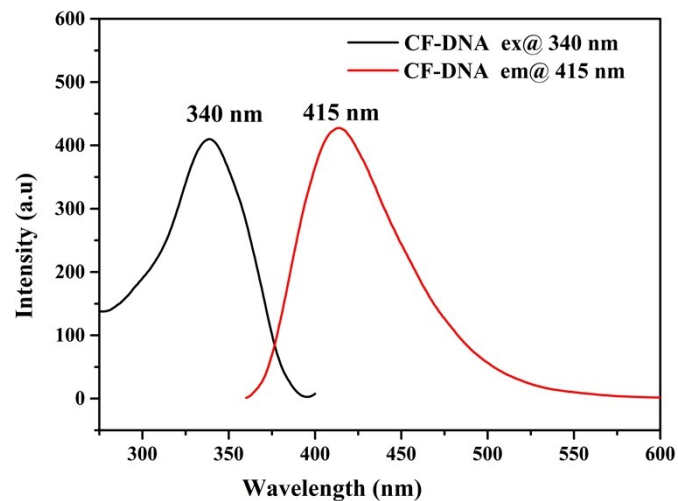

**Fig. S10** The fluorescence spectra of CF-DNA probe.

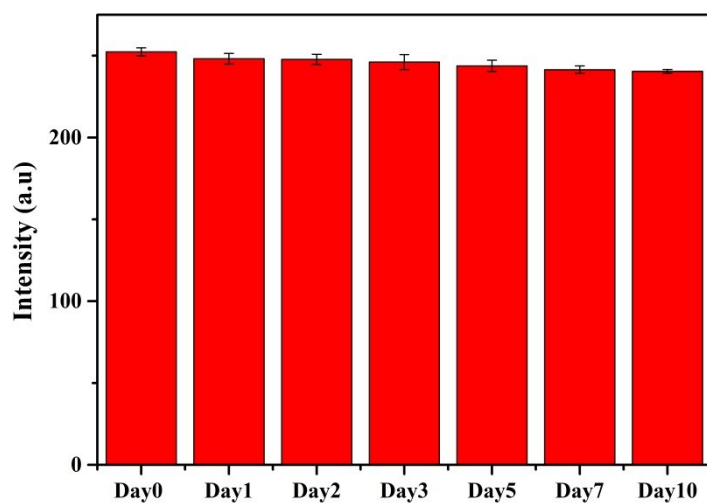

**Fig. S11** Stability of the CF-DNA probe at 0-10d.

**Table S1** Comparison of nucleic acid biosensors for the detection of Pb<sup>2+</sup>.

| Sensors                     | LOD     | response times | Linear range(s) | selectivity | Reference |
|-----------------------------|---------|----------------|-----------------|-------------|-----------|
| CF-DNA probe                | 0.36 nM | 15 min         | 0-1 nM          | good        | this work |
| FAM-aptamer/AuNPs           | 10 nM   | 15 min         | 12.5-100 nM     | good        | 4         |
| T30695 aptamer/SYBR Green I | 18 nM   | 25 min         | 0-480 nM        | good        | 5         |
| RNA aptamer                 | 6 nM    | 15 min         | 5-500 nM        | good        | 6         |
| Cu QCs/BSA                  | 2 nM    | not reported   | 0-0.2 nM        | good        | 7         |
| DNA duplex-quadruplex       | 20 nM   | 2 h            | 20-1 μM         | good        | 8         |
| AuNPs/DNAzyme               | 20 nM   | 10 min         | not reported    | good        | 9         |
| Electrochemical bisensor    | 0.5 nM  | not reported   | 0.5-50 μM       | good        | 10        |
| NMM-G-quadruplex aptamer    | 1 nM    | 30 min         | 5 nM-1 μM       | good        | 11        |
| glutathione modified AuNDs  | 2 nM    | 2 h            | 5-5 μM          | good        | 12        |
| thrombin binding aptamer    | 0.9 nM  | 5 min          | 1-120 nM        | moderate    | 13        |
| single-stranded DNAzyme     | 3.1 nM  | 35 min         | 5-100 nM.       | good        | 14        |

## References

1. R. R. Nayak, O. K. Nag, Y. W. Han, S. Hwang, D. Vak, D. Korystov, Y. Jin and H. Suh, *Curr. Appl. Phys.*, 2009, **9**, 636-642.
2. E. Ergen, M. Weber, J. J. Dr, A. H. Dr and K. M. Dr, *Chemistry (Weinheim an der Bergstrasse, Germany)*, 2006, **12**, 3707.
3. Y. Jia, P. Gao, Y. Zhuang, M. Miao, X. Lou and F. Xia, *Anal. Chem.*, 2016, **88**, 6621.
4. C. Liu and C. Z. Huang, *Chinese J. Anal. Chem.*, 2014, **42**, 1195-1198.
5. S. Zhan, Y. Wu, Y. Luo, L. Liu, L. He, H. Xing and P. Zhou, *Anal. Biochem.*, 2014, **462**, 19-25.



- 
6. S. Dasgupta, S. A. Shelke, N. S. Li and J. A. Piccirilli, *Chem. Commun.*, 2015, **51**, 9034-9037.
  7. N. Goswami, A. Giri, M. S. Bootharaju, P. L. Xavier, T. Pradeep and S. K. Pal, *Anal. Chem.*, 2011, **83**, 9676-9680.
  8. T. Li, S. Dong and E. Wang, *J. Am. Chem. Soc.*, 2010, **132**, 13156.
  9. Z. Wang, B. Chen, J. Duan, T. Hao, X. Jiang, Z. Guo and S. Wang, *J. Anal. Chem.*, 2015, **70**, 339-345.
  10. L. Z, C. Y, L. X and F. W, *Analyst*, 2011, **136**, 2367.
  11. L. Guo, D. Nie, C. Qiu, Q. Zheng, H. Wu, P. Ye, Y. Hao, F. F. Fu and G. Chen, *Biosens. Bioelectron.*, 2012, **35**, 123-127.
  12. Z. Yuan, M. Peng, Y. He and E. S. Yeung, *Chem. Commun.*, 2011, **47**, 11981-11983.
  13. X. B. Fu, F. Qu, N. B. Li and H. Q. Luo, *Analyst*, 2012, **137**, 1097-1099.
  14. H. Li, Q. Zhang, Y. Cai, D. M. Kong and H. X. Shen, *Biosens. Bioelectron.*, 2012, **34**, 159-164.
